# Supplementary material
Source: Springer Nature journal article supplement (https://www.springermedizin.de/resource/supplementary/12916_2013_816_MOESM1_ESM.pdf/9598370)
Supplement: MOESM1 [file 9598370]

# Normal Breast Cell Subpopulations

# Breast Cancer Cell Subpopulations

**Luminal Differentiated Cells: C**  
 ALDH: low  
 CD44<sup>high</sup>/CD24<sup>low</sup>: 11%  
 Ep-CAM<sup>+</sup>/MUC-1<sup>neg</sup>: 16%

**Luminal Progenitor Cells: B**  
 ALDH<sup>high</sup>: 34%  
 CD10: neg  
 CD44<sup>high</sup>/CD24<sup>low</sup>: 7%  
 Ep-CAM<sup>+</sup>/MUC-1<sup>-</sup>: 67%

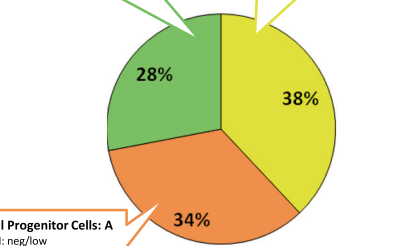

**Basal Progenitor Cells: A**  
 ALDH: neg/low  
 CD10: 57%  
 CD44<sup>high</sup>/CD24<sup>low</sup>: 21%  
 Ep-CAM<sup>+</sup>/MUC-1<sup>-</sup>: 25%

**Luminal Differentiated Cells: C**  
 ALDH<sup>+</sup>: 8%  
 CD44<sup>high</sup>/CD24<sup>low</sup>: 12%

**Basal Progenitor Cells: A**  
 Not tested

**Luminal Progenitor Cells: B**  
 ALDH<sup>+</sup>: 35%  
 CD44<sup>high</sup>/CD24<sup>low</sup>: 14%

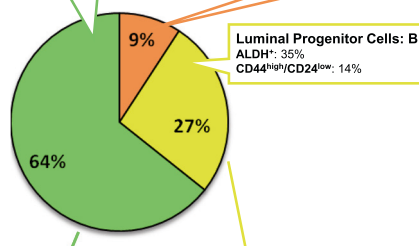

**Mammospheres**

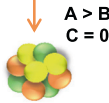

**Colony-forming ability**

**Low**

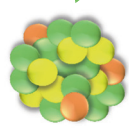

**Medium**

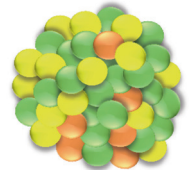

**High**

■ Ep-CAM<sup>low</sup>/CD49<sup>+</sup>    
 ■ Ep-CAM<sup>high</sup>/CD49<sup>+</sup>    
 ■ Ep-CAM<sup>high</sup>/CD49<sup>neg</sup>
